# Supplementary material for: Development and evaluation of oral Cancer quality-of-life questionnaire (QOL-OC)
Source: BMC Cancer. 2018 May 3;18:523. doi: 10.1186/s12885-018-4378-6 (PMC5934940; doi:10.1186/s12885-018-4378-6)
Supplement: Supplementary file 3 — Scores of QOL-OC, this table shows the primary score of patients answering the C30 questionnaire include retest. (PDF 1558 kb) [file 12885_2018_4378_MOESM3_ESM.pdf]

| Number of patients | Score of OC and retest |    |    |    |    |    |    |    |    |    |    |    |    |    |    |    |    |    |    |    |    |    |    |    |    |    |    |    | 59 |     |              |          |     |           |            |     |     |              |
|--------------------|------------------------|----|----|----|----|----|----|----|----|----|----|----|----|----|----|----|----|----|----|----|----|----|----|----|----|----|----|----|----|-----|--------------|----------|-----|-----------|------------|-----|-----|--------------|
|                    | 31                     | 32 | 33 | 34 | 35 | 36 | 37 | 38 | 39 | 40 | 41 | 42 | 43 | 44 | 45 | 46 | 47 | 48 | 49 | 50 | 51 | 52 | 53 | 54 | 55 | 56 | 57 | 58 |    |     |              |          |     |           |            |     |     |              |
| 1                  | 2                      | 1  | 1  | 1  | 2  | 1  | 2  | 4  | 2  | 4  | 1  | 2  | 1  | 2  | 1  | 1  | 1  | 2  | 1  | 1  | 1  | 2  | 3  | 1  | 1  | 1  | 1  | 1  | 1  | CDH |              |          |     |           |            |     |     |              |
| 2                  | 2                      | 2  | 1  | 1  | 2  | 1  | 1  | 2  | 1  | 2  | 1  | 2  | 2  | 1  | 1  | 1  | 1  | 1  | 1  | 1  | 2  | 2  | 1  | 1  | 1  | 1  | 1  | 1  | 1  | AGJ |              |          |     |           |            |     |     |              |
| 3                  | 1                      | 1  | 1  | 1  | 1  | 1  | 1  | 1  | 1  | 1  | 1  | 2  | 2  | 1  | 1  | 2  | 1  | 1  | 1  | 1  | 2  | 3  | 2  | 1  | 1  | 1  | 1  | 1  | 1  | EGJ |              |          |     |           |            |     |     |              |
| 4                  | 1                      | 1  | 1  | 1  | 1  | 3  | 3  | 3  | 1  | 1  | 1  | 2  | 2  | 1  | 1  | 4  | 1  | 1  | 1  | 1  | 1  | 4  | 1  | 1  | 1  | 1  | 1  | 1  | 1  | 1   | E            |          |     |           |            |     |     |              |
| 5                  | 2                      | 1  | 1  | 1  | 1  | 1  | 1  | 3  | 1  | 3  | 2  | 1  | 2  | 4  | 2  | 1  | 1  | 1  | 1  | 2  | 1  | 1  | 2  | 1  | 1  | 1  | 1  | 1  | 1  | 1   | K nerve ache |          |     |           |            |     |     |              |
| 6                  | 1                      | 1  | 1  | 1  | 1  | 1  | 2  | 2  | 1  | 1  | 2  | 2  | 1  | 1  | 1  | 1  | 1  | 1  | 1  | 1  | 1  | 1  | 1  | 1  | 1  | 1  | 1  | 1  | 2  | 1   | C            |          |     |           |            |     |     |              |
| 7                  | 1                      | 1  | 1  | 3  | 1  | 1  | 2  | 1  | 1  | 1  | 1  | 1  | 1  | 1  | 2  | 2  | 2  | 2  | 4  | 1  | 1  | 1  | 3  | 2  | 1  | 1  | 1  | 2  | 1  | 1   | 1            | E        |     |           |            |     |     |              |
| 8                  | 1                      | 1  | 1  | 1  | 1  | 1  | 1  | 2  | 1  | 1  | 1  | 2  | 2  | 1  | 1  | 1  | 2  | 2  | 4  | 1  | 1  | 1  | 1  | 1  | 1  | 1  | 1  | 1  | 1  | 1   | 2            | K social |     |           |            |     |     |              |
| 9                  | 3                      | 1  | 1  | 1  | 1  | 1  | 1  | 1  | 1  | 1  | 1  | 2  | 2  | 2  | 1  | 1  | 1  | 1  | 2  | 1  | 1  | 1  | 1  | 1  | 1  | 1  | 1  | 1  | 1  | 1   | 1            | AFI      |     |           |            |     |     |              |
| 10                 | 1                      | 1  | 1  | 1  | 1  | 1  | 4  | 1  | 1  | 4  | 1  | 2  | 1  | 1  | 2  | 1  | 1  | 1  | 1  | 1  | 1  | 1  | 3  | 1  | 1  | 1  | 1  | 1  | 1  | 1   | 1            | DE       |     |           |            |     |     |              |
| 11                 | 1                      | 1  | 1  | 1  | 1  | 1  | 1  | 1  | 1  | 1  | 1  | 1  | 1  | 2  | 1  | 1  | 1  | 1  | 1  | 1  | 1  | 1  | 1  | 1  | 1  | 1  | 1  | 1  | 1  | 1   | 2            | 无        |     |           |            |     |     |              |
| 12                 | 1                      | 1  | 1  | 1  | 1  | 1  | 1  | 1  | 1  | 1  | 2  | 1  | 1  | 2  | 1  | 1  | 1  | 1  | 1  | 1  | 1  | 1  | 2  | 2  | 1  | 1  | 1  | 1  | 1  | 1   | 1            | 无        |     |           |            |     |     |              |
| 13                 | 1                      | 1  | 1  | 1  | 1  | 1  | 1  | 1  | 1  | 1  | 1  | 2  | 2  | 1  | 1  | 1  | 1  | 1  | 1  | 1  | 1  | 1  | 1  | 2  | 1  | 1  | 1  | 1  | 1  | 1   | 1            | H        |     |           |            |     |     |              |
| 14                 | 1                      | 1  | 1  | 1  | 1  | 1  | 1  | 1  | 1  | 2  | 1  | 1  | 1  | 1  | 1  | 1  | 1  | 1  | 1  | 1  | 1  | 1  | 1  | 1  | 1  | 1  | 1  | 1  | 1  | 1   | 1            | 无        |     |           |            |     |     |              |
| 15                 | 1                      | 1  | 1  | 1  | 1  | 1  | 2  | 1  | 2  | 1  | 1  | 1  | 1  | 1  | 1  | 1  | 1  | 1  | 1  | 1  | 1  | 1  | 1  | 1  | 1  | 1  | 1  | 1  | 1  | 1   | 1            | 无        |     |           |            |     |     |              |
| 16                 | 2                      | 1  | 1  | 2  | 1  | 1  | 4  | 2  | 4  | 1  | 2  | 1  | 1  | 1  | 1  | 1  | 1  | 1  | 1  | 1  | 2  | 2  | 1  | 2  | 1  | 1  | 1  | 1  | 1  | 1   | 1            | DK sleep |     |           |            |     |     |              |
| 17                 | 1                      | 1  | 1  | 1  | 1  | 1  | 3  | 3  | 1  | 2  | 1  | 2  | 1  | 2  | 1  | 2  | 1  | 2  | 2  | 1  | 1  | 2  | 3  | 2  | 1  | 1  | 1  | 2  | 1  | 1   | 1            | 1        | CDJ |           |            |     |     |              |
| 18                 | 1                      | 1  | 1  | 1  | 1  | 1  | 1  | 1  | 1  | 1  | 1  | 1  | 1  | 1  | 1  | 1  | 1  | 1  | 1  | 1  | 2  | 2  | 1  | 1  | 1  | 1  | 1  | 1  | 1  | 1   | 1            | BDJ      |     |           |            |     |     |              |
| 19                 | 1                      | 1  | 1  | 1  | 1  | 1  | 3  | 1  | 2  | 2  | 1  | 2  | 1  | 2  | 1  | 2  | 1  | 2  | 2  | 2  | 1  | 1  | 3  | 4  | 1  | 1  | 1  | 1  | 1  | 1   | 1            | 2        | DEJ |           |            |     |     |              |
| 20                 | 2                      | 1  | 1  | 2  | 1  | 1  | 1  | 1  | 1  | 1  | 4  | 4  | 1  | 1  | 1  | 1  | 1  | 2  | 2  | 1  | 1  | 1  | 2  | 2  | 1  | 1  | 1  | 1  | 1  | 1   | 1            | 1        | EG  |           |            |     |     |              |
| 21                 | 1                      | 1  | 1  | 1  | 1  | 1  | 2  | 1  | 1  | 1  | 1  | 1  | 1  | 1  | 1  | 1  | 1  | 1  | 1  | 1  | 1  | 1  | 1  | 1  | 1  | 1  | 1  | 1  | 1  | 1   | 1            | 1        | DEJ |           |            |     |     |              |
| 22                 | 1                      | 1  | 3  | 1  | 3  | 1  | 3  | 1  | 3  | 1  | 1  | 1  | 3  | 1  | 1  | 1  | 1  | 1  | 1  | 1  | 1  | 2  | 2  | 1  | 1  | 1  | 1  | 1  | 1  | 1   | 1            | 1        | DIJ |           |            |     |     |              |
| 23                 | 1                      | 1  | 1  | 1  | 1  | 1  | 1  | 1  | 1  | 1  | 2  | 1  | 2  | 1  | 2  | 1  | 1  | 1  | 1  | 1  | 1  | 1  | 1  | 2  | 1  | 1  | 1  | 1  | 1  | 1   | 1            | 1        | 1   | EFJ       |            |     |     |              |
| 24                 | 2                      | 1  | 1  | 2  | 1  | 1  | 4  | 1  | 2  | 2  | 1  | 1  | 2  | 4  | 1  | 1  | 1  | 2  | 1  | 1  | 3  | 3  | 2  | 1  | 1  | 1  | 1  | 1  | 1  | 1   | 1            | 1        | 1   | BDJ       |            |     |     |              |
| 25                 | 1                      | 3  | 3  | 3  | 1  | 1  | 4  | 2  | 2  | 1  | 3  | 3  | 4  | 3  | 1  | 1  | 1  | 1  | 4  | 2  | 3  | 3  | 3  | 4  | 3  | 1  | 1  | 1  | 1  | 1   | 1            | 1        | 1   | BGH       |            |     |     |              |
| 26                 | 1                      | 1  | 1  | 1  | 1  | 1  | 2  | 2  | 1  | 2  | 4  | 1  | 1  | 1  | 2  | 2  | 2  | 2  | 3  | 1  | 3  | 3  | 2  | 1  | 1  | 1  | 1  | 1  | 1  | 1   | 1            | 1        | 1   | DGJ       |            |     |     |              |
| 27                 | 1                      | 1  | 1  | 1  | 1  | 1  | 1  | 1  | 1  | 1  | 1  | 2  | 2  | 1  | 2  | 1  | 1  | 1  | 1  | 1  | 1  | 3  | 4  | 2  | 2  | 1  | 1  | 1  | 1  | 1   | 1            | 1        | 1   | CK tongue |            |     |     |              |
| 28                 | 2                      | 1  | 1  | 1  | 1  | 1  | 1  | 1  | 1  | 1  | 2  | 1  | 2  | 1  | 2  | 1  | 1  | 1  | 1  | 1  | 2  | 3  | 1  | 1  | 1  | 1  | 1  | 1  | 1  | 1   | 1            | 1        | 1   | ABJ       |            |     |     |              |
| 29                 | 2                      | 1  | 1  | 1  | 1  | 1  | 1  | 1  | 1  | 1  | 1  | 1  | 1  | 1  | 2  | 1  | 1  | 2  | 1  | 1  | 1  | 1  | 1  | 2  | 1  | 1  | 1  | 1  | 1  | 1   | 1            | 1        | 1   | EH        |            |     |     |              |
| 30                 | 1                      | 1  | 1  | 1  | 1  | 1  | 1  | 1  | 1  | 1  | 1  | 1  | 1  | 1  | 1  | 1  | 1  | 1  | 1  | 1  | 1  | 2  | 1  | 1  | 1  | 1  | 1  | 1  | 1  | 1   | 1            | 1        | 1   | J         |            |     |     |              |
| 31                 | 2                      | 1  | 1  | 2  | 1  | 1  | 2  | 1  | 1  | 1  | 1  | 1  | 1  | 1  | 2  | 1  | 2  | 2  | 1  | 1  | 3  | 3  | 2  | 1  | 1  | 1  | 1  | 2  | 1  | 1   | 1            | 1        | 1   | ADJ       |            |     |     |              |
| 32                 | 1                      | 1  | 1  | 1  | 1  | 1  | 1  | 1  | 1  | 1  | 1  | 1  | 2  | 2  | 1  | 1  | 1  | 1  | 1  | 1  | 1  | 1  | 2  | 1  | 2  | 1  | 1  | 1  | 1  | 1   | 1            | 1        | 1   | F         |            |     |     |              |
| 33                 | 1                      | 1  | 1  | 1  | 1  | 1  | 1  | 1  | 1  | 1  | 2  | 1  | 1  | 1  | 1  | 1  | 1  | 1  | 1  | 1  | 2  | 2  | 2  | 1  | 1  | 1  | 1  | 1  | 1  | 1   | 1            | 1        | 1   | C         |            |     |     |              |
| 34                 | 4                      | 4  | 1  | 4  | 1  | 4  | 4  | 2  | 3  | 2  | 4  | 3  | 1  | 1  | 4  | 3  | 3  | 4  | 1  | 1  | 4  | 4  | 4  | 3  | 1  | 4  | 1  | 1  | 1  | 1   | 1            | 1        | 1   | 2         | AEG        |     |     |              |
| 35                 | 1                      | 1  | 1  | 1  | 1  | 1  | 1  | 1  | 1  | 1  | 2  | 1  | 2  | 1  | 1  | 2  | 1  | 2  | 1  | 1  | 2  | 2  | 2  | 1  | 1  | 1  | 1  | 1  | 1  | 1   | 1            | 1        | 1   | 2         | EGJ        |     |     |              |
| 36                 | 1                      | 1  | 1  | 1  | 1  | 1  | 1  | 1  | 1  | 1  | 1  | 1  | 1  | 1  | 1  | 1  | 1  | 1  | 1  | 1  | 1  | 2  | 1  | 1  | 1  | 1  | 1  | 1  | 1  | 1   | 1            | 1        | 1   | 2         | EJK social |     |     |              |
| 37                 | 1                      | 1  | 1  | 2  | 1  | 1  | 2  | 1  | 1  | 2  | 2  | 2  | 1  | 1  | 1  | 1  | 1  | 1  | 1  | 1  | 2  | 2  | 1  | 3  | 2  | 1  | 1  | 1  | 1  | 1   | 1            | 1        | 1   | 1         | 1          | CDH |     |              |
| 38                 | 2                      | 1  | 1  | 1  | 1  | 1  | 2  | 2  | 1  | 1  | 2  | 2  | 2  | 1  | 1  | 1  | 1  | 1  | 1  | 1  | 2  | 1  | 1  | 1  | 1  | 1  | 1  | 1  | 1  | 1   | 1            | 1        | 1   | 1         | 2          | CFG |     |              |
| 39                 | 1                      | 1  | 1  | 1  | 1  | 1  | 1  | 1  | 1  | 1  | 2  | 2  | 1  | 2  | 2  | 1  | 2  | 2  | 2  | 2  | 1  | 1  | 2  | 1  | 1  | 2  | 1  | 1  | 1  | 1   | 1            | 1        | 1   | 1         | 2          | BGH |     |              |
| 40                 | 1                      | 1  | 1  | 1  | 2  | 1  | 1  | 1  | 1  | 1  | 2  | 1  | 1  | 1  | 1  | 1  | 1  | 1  | 1  | 1  | 1  | 1  | 1  | 1  | 1  | 1  | 1  | 1  | 1  | 1   | 1            | 1        | 1   | 1         | DF         |     |     |              |
| 41                 | 1                      | 1  | 2  | 2  | 1  | 1  | 1  | 1  | 1  | 1  | 2  | 1  | 1  | 1  | 1  | 2  | 1  | 2  | 2  | 1  | 1  | 2  | 2  | 1  | 1  | 2  | 1  | 1  | 2  | 2   | 1            | 1        | 1   | 1         | 1          | EJ  |     |              |
| 42                 | 2                      | 1  | 1  | 2  | 1  | 1  | 4  | 1  | 1  | 2  | 1  | 1  | 1  | 2  | 2  | 1  | 2  | 2  | 1  | 1  | 2  | 2  | 2  | 1  | 1  | 1  | 1  | 1  | 1  | 1   | 1            | 1        | 1   | 1         | 1          | DIJ |     |              |
| 43                 | 1                      | 1  | 1  | 2  | 1  | 1  | 1  | 1  | 1  | 1  | 1  | 1  | 1  | 1  | 1  | 1  | 1  | 1  | 1  | 1  | 1  | 2  | 2  | 1  | 1  | 1  | 1  | 1  | 1  | 1   | 1            | 1        | 1   | 1         | 1          | 2   | HJ  |              |
| 44                 | 1                      | 1  | 1  | 1  | 2  | 1  | 1  | 3  | 1  | 1  | 1  | 1  | 1  | 1  | 1  | 1  | 1  | 1  | 1  | 1  | 3  | 2  | 2  | 1  | 1  | 1  | 1  | 1  | 1  | 1   | 1            | 1        | 1   | 1         | 1          | 1   | CJ  |              |
| 45                 | 2                      | 2  | 1  | 2  | 1  | 1  | 4  | 1  | 2  | 3  | 1  | 1  | 1  | 2  | 1  | 1  | 1  | 1  | 1  | 1  | 2  | 2  | 1  | 1  | 1  | 1  | 1  | 1  | 1  | 1   | 1            | 1        | 1   | 1         | 1          | 1   | D   |              |
| 46                 | 2                      | 1  | 1  | 2  | 1  | 1  | 1  | 1  | 2  | 1  | 2  | 1  | 1  | 1  | 2  | 1  | 1  | 1  | 1  | 1  | 1  | 1  | 2  | 1  | 2  | 1  | 1  | 1  | 1  | 1   | 1            | 1        | 1   | 1         | 1          | B   |     |              |
| 47                 | 1                      | 1  | 1  | 2  | 1  | 1  | 2  | 1  | 1  | 1  | 1  | 2  | 1  | 3  | 1  | 1  | 1  | 1  | 1  | 1  | 1  | 1  | 1  | 2  | 1  | 1  | 1  | 1  | 1  | 1   | 1            | 1        | 1   | 1         | 1          | 1   | BDG |              |
| 48                 | 2                      | 2  | 1  | 2  | 1  | 1  | 3  | 1  | 1  | 2  | 1  | 1  | 1  | 2  | 2  | 1  | 1  | 2  | 2  | 1  | 1  | 2  | 2  | 1  | 1  | 1  | 1  | 1  | 1  | 1   | 1            | 1        | 1   | 1         | 1          | 1   | AGH |              |
| 49                 | 1                      | 1  | 1  | 1  | 1  | 1  | 3  | 3  | 1  | 1  | 1  | 2  | 4  | 3  | 3  | 2  | 2  | 3  | 4  | 1  | 4  | 4  | 4  | 2  | 1  | 1  | 1  | 1  | 1  | 1   | 1            | 1        | 1   | 1         | 1          | 1   | 1   | BCF          |
| 50                 | 1                      | 1  | 2  | 1  | 1  | 1  | 2  | 1  | 2  | 1  | 2  | 2  | 1  | 2  | 1  | 2  | 1  | 2  | 1  | 2  | 1  | 2  | 1  | 2  | 1  | 1  | 1  | 1  | 1  | 1   | 1            | 1        | 1   | 1         | 1          | 1   | 1   | CEH          |
| 51                 | 1                      | 1  | 1  | 1  | 1  | 1  | 4  | 2  | 2  | 2  | 1  | 2  | 1  | 2  | 3  | 3  | 2  | 3  | 3  | 1  | 1  | 2  | 3  | 2  | 1  | 1  | 1  | 1  | 1  | 1   | 1            | 1        | 1   | 1         | 1          | 1   | 2   | CHJ          |
| 52                 | 2                      | 1  | 1  | 1  | 1  | 1  | 1  | 1  | 1  | 2  | 1  | 1  | 1  | 1  | 1  | 1  | 1  | 1  | 1  | 1  | 1  | 2  | 1  | 1  | 1  | 1  | 1  | 1  | 1  | 1   | 1            | 1        | 1   | 1         | 1          | 1   | J   |              |
| 53                 | 1                      | 1  | 1  | 2  | 1  | 1  | 4  | 1  | 2  | 1  | 2  | 1  | 2  | 1  | 2  | 1  | 1  | 1  | 1  | 1  | 1  | 1  | 1  | 2  | 1  | 1  | 1  | 1  | 1  | 1   | 1            | 1        | 1   | 1         | 1          | 1   | 1   | BDH          |
| 54                 | 1                      | 1  | 1  | 1  | 1  | 1  | 1  | 1  | 2  | 1  | 2  | 2  | 1  | 1  | 1  | 1  | 1  | 2  | 1  | 1  | 1  | 1  | 1  | 1  | 1  | 1  | 1  | 1  | 1  | 1   | 1            | 1        | 1   | 1         | 1          | 1   | 2   | K open mouth |
| 55                 | 1                      | 1  | 1  | 1  | 1  | 1  | 1  | 1  | 2  | 1  | 2  | 1  | 1  | 1  | 1  | 1  | 1  | 1  | 1  | 1  | 2  | 2  | 1  | 1  | 1  | 1  | 1  | 1  | 1  | 1   | 1            | 1        | 1   | 1         | 1          | 1   | 1   | J            |
| 56                 | 1                      | 1  | 1  | 1  | 1  | 1  | 2  | 2  | 2  | 2  | 1  | 2  | 1  | 1  | 1  | 1  | 1  | 1  | 1  | 1  | 1  | 1  | 2  | 1  | 1  | 1  | 1  | 1  | 1  | 1   | 1            | 1        | 1   | 1         | 1          | 1   | 1   | CDG          |
| 57                 |                        |    |    |    |    |    |    |    |    |    |    |    |    |    |    |    |    |    |    |    |    |    |    |    |    |    |    |    |    |     |              |          |     |           |            |     |     |              |

|     |   |   |   |   |   |   |   |   |   |   |   |   |   |   |   |   |   |   |   |   |   |   |   |   |   |   |   |   |   |       |                          |                                              |
|-----|---|---|---|---|---|---|---|---|---|---|---|---|---|---|---|---|---|---|---|---|---|---|---|---|---|---|---|---|---|-------|--------------------------|----------------------------------------------|
| 82  | 2 |   |   | 1 |   | 2 | 1 | 1 | 4 | 3 | 1 | 4 | 1 | 4 | 2 | 2 | 1 | 2 | 2 | 1 | 2 | 1 | 2 | 2 | 3 | 4 | 1 | 4 | 1 | 1 BCE |                          |                                              |
| 83  | 2 | 1 | 1 | 1 | 2 | 1 | 1 | 1 | 3 | 2 | 3 | 2 | 3 | 2 | 1 | 1 | 1 | 1 | 1 | 1 | 1 | 1 | 1 | 2 | 3 | 3 | 3 | 1 | 1 | 2 ADE |                          |                                              |
| 84  | 1 | 1 | 1 | 2 | 2 | 1 | 1 | 1 | 2 | 2 | 2 | 3 | 2 | 3 | 1 | 3 | 1 | 1 | 2 | 2 | 1 | 1 | 1 | 2 | 1 | 1 | 1 | 1 | 2 | 1 BDE |                          |                                              |
| 85  | 1 | 1 | 2 | 1 | 2 | 1 | 1 | 1 | 3 | 1 | 1 | 2 | 2 | 1 | 1 | 2 | 1 | 1 | 2 | 2 | 1 | 1 | 2 | 2 | 2 | 1 | 1 | 1 | 1 | 2 GH  |                          |                                              |
| 86  | 1 | 1 | 1 | 1 | 2 | 1 | 1 | 1 | 2 | 1 | 2 | 1 | 2 | 1 | 1 | 1 | 1 | 1 | 1 | 1 | 1 | 1 | 2 | 1 | 1 | 1 | 1 | 1 | 1 | 1 GIK |                          |                                              |
| 87  | 1 | 1 | 1 | 1 | 1 | 1 | 1 | 1 | 1 | 1 | 1 | 1 | 1 | 1 | 1 | 1 | 1 | 1 | 1 | 1 | 1 | 1 | 1 | 1 | 1 | 1 | 1 | 1 | 1 | 2 DGJ |                          |                                              |
| 88  | 1 | 1 | 1 | 1 | 2 | 1 | 1 | 1 | 2 | 1 | 1 | 2 | 2 | 1 | 1 | 1 | 1 | 1 | 1 | 1 | 1 | 1 | 2 | 2 | 2 | 2 | 1 | 1 | 1 | 1 BH  |                          |                                              |
| 89  | 2 | 1 | 1 | 1 | 1 | 1 | 1 | 1 | 2 | 1 | 1 | 1 | 1 | 1 | 1 | 1 | 1 | 1 | 1 | 1 | 1 | 1 | 1 | 1 | 1 | 1 | 1 | 1 | 1 | 2 AIK |                          |                                              |
| 90  | 1 | 1 | 1 | 1 | 2 | 1 | 1 | 1 | 4 | 1 | 1 | 2 | 1 | 1 | 2 | 1 | 1 | 1 | 2 | 1 | 1 | 2 | 1 | 1 | 3 | 3 | 1 | 1 | 1 | 1 BDE |                          |                                              |
| 91  | 1 | 1 | 1 | 1 | 1 | 1 | 1 | 1 | 1 | 1 | 1 | 1 | 4 | 2 | 1 | 1 | 2 | 1 | 1 | 1 | 2 | 1 | 1 | 1 | 1 | 1 | 1 | 1 | 1 | 1     |                          |                                              |
| 92  | 2 | 1 | 1 | 1 | 1 | 2 | 1 | 1 | 2 | 1 | 1 | 2 | 1 | 1 | 1 | 1 | 1 | 1 | 1 | 1 | 1 | 1 | 1 | 1 | 1 | 1 | 1 | 1 | 1 | 2     | 1                        |                                              |
| 93  | 1 | 1 | 1 | 1 | 1 | 1 | 1 | 1 | 1 | 1 | 2 | 1 | 2 | 3 | 1 | 1 | 2 | 1 | 2 | 1 | 1 | 2 | 1 | 1 | 2 | 1 | 1 | 1 | 1 | 1     | 2 EG chin                |                                              |
| 94  | 1 | 1 | 1 | 1 | 1 | 3 | 3 | 3 | 3 | 1 | 4 | 2 | 2 | 1 | 1 | 1 | 3 | 3 | 3 | 1 | 1 | 3 | 1 | 4 | 1 | 4 | 1 | 1 | 1 | 1     | 1 DE                     |                                              |
| 95  | 1 | 1 | 1 | 1 | 1 | 3 | 3 | 3 | 1 | 1 | 1 | 2 | 4 | 1 | 1 | 3 | 2 | 1 | 3 | 3 | 1 | 1 | 3 | 1 | 3 | 1 | 1 | 1 | 1 | 2     | 1                        |                                              |
| 96  | 2 | 1 | 1 | 1 | 1 | 1 | 2 | 3 | 1 | 1 | 1 | 1 | 2 | 1 | 1 | 1 | 2 | 2 | 2 | 1 | 1 | 2 | 1 | 3 | 1 | 3 | 1 | 1 | 1 | 2     | 1                        |                                              |
| 97  | 1 | 1 | 1 | 1 | 1 | 1 | 1 | 4 | 2 | 1 | 2 | 3 | 2 | 1 | 2 | 3 | 1 | 1 | 1 | 4 | 1 | 2 | 3 | 3 | 2 | 2 | 1 | 1 | 1 | 1     | 1 E walk                 |                                              |
| 98  | 1 | 1 | 1 | 1 | 1 | 1 | 1 | 1 | 1 | 1 | 1 | 1 | 1 | 1 | 1 | 4 | 1 | 1 | 1 | 1 | 1 | 1 | 1 | 2 | 1 | 1 | 1 | 1 | 1 | 1     | 1 B                      |                                              |
| 99  | 1 | 1 | 1 | 1 | 1 | 1 | 1 | 4 | 1 | 1 | 3 | 1 | 2 | 2 | 1 | 1 | 1 | 1 | 1 | 1 | 1 | 1 | 1 | 2 | 2 | 1 | 1 | 1 | 1 | 1     | 1                        |                                              |
| 100 | 2 | 2 | 2 | 2 | 4 | 4 | 1 | 2 | 2 | 2 | 3 | 4 | 1 | 2 | 3 | 3 | 3 | 3 | 1 | 4 | 1 | 4 | 3 | 3 | 1 | 4 | 3 | 1 | 1 | 1     | 1 BEG every              |                                              |
| 101 | 1 | 1 | 1 | 1 | 1 | 1 | 1 | 1 | 2 | 2 | 1 | 3 | 2 | 1 | 1 | 1 | 1 | 1 | 2 | 1 | 1 | 1 | 1 | 1 | 2 | 1 | 1 | 1 | 1 | 1     | 1 GTinnitus and insomnia |                                              |
| 102 | 2 | 1 | 1 | 1 | 2 | 1 | 1 | 1 | 1 | 1 | 1 | 1 | 1 | 1 | 1 | 1 | 1 | 1 | 1 | 1 | 1 | 1 | 1 | 1 | 1 | 1 | 1 | 1 | 1 | 1     | 1 gum pain               |                                              |
| 103 | 1 | 1 | 2 | 1 | 1 | 1 | 1 | 1 | 1 | 1 | 2 | 2 | 1 | 1 | 2 | 1 | 1 | 1 | 1 | 1 | 1 | 2 | 1 | 1 | 1 | 1 | 1 | 1 | 1 | 1     | 1 BI                     |                                              |
| 104 | 2 | 1 | 1 | 1 | 1 | 1 | 1 | 1 | 1 | 2 | 1 | 3 | 1 | 1 | 3 | 1 | 1 | 1 | 1 | 1 | 2 | 1 | 2 | 2 | 1 | 1 | 1 | 1 | 1 | 1     | 1 I tired                |                                              |
| 105 | 2 | 2 | 2 | 2 | 2 | 1 | 1 | 2 | 3 | 2 | 1 | 2 | 1 | 2 | 1 | 1 | 1 | 2 | 2 | 1 | 2 | 2 | 2 | 1 | 1 | 2 | 1 | 1 | 1 | 1     | 1                        | 1 D                                          |
| 106 | 1 | 2 | 1 | 2 | 1 | 1 | 1 | 1 | 1 | 2 | 2 | 2 | 2 | 2 | 2 | 1 | 1 | 1 | 1 | 1 | 1 | 1 | 1 | 2 | 1 | 1 | 2 | 1 | 1 | 1     | 1                        | 1                                            |
| 107 | 3 | 2 | 2 | 3 | 2 | 3 | 2 | 3 | 3 | 1 | 3 | 2 | 2 | 2 | 2 | 1 | 2 | 1 | 1 | 1 | 2 | 1 | 3 | 4 | 1 | 1 | 1 | 1 | 1 | 1     | 1                        | 1 AC                                         |
| 108 | 1 | 1 | 2 | 1 | 1 | 1 | 1 | 1 | 1 | 2 | 2 | 2 | 1 | 1 | 1 | 1 | 1 | 1 | 1 | 2 | 1 | 1 | 1 | 4 | 1 | 1 | 1 | 1 | 1 | 2     | 1                        | 1                                            |
| 109 | 2 | 1 | 1 | 1 | 1 | 1 | 1 | 3 | 1 | 1 | 1 | 2 | 1 | 1 | 1 | 2 | 1 | 1 | 1 | 2 | 1 | 1 | 1 | 1 | 1 | 1 | 1 | 1 | 1 | 1     | 1                        | 1 AD                                         |
| 110 | 1 | 1 | 1 | 1 | 1 | 1 | 1 | 1 | 1 | 1 | 1 | 1 | 1 | 1 | 1 | 1 | 1 | 1 | 1 | 1 | 1 | 1 | 1 | 1 | 2 | 2 | 1 | 1 | 1 | 1     | 1                        | 2 Less sedentary and activity in the evening |
| 111 | 1 | 1 | 1 | 1 | 1 | 1 | 1 | 2 | 1 | 2 | 2 | 1 | 1 | 1 | 1 | 1 | 1 | 1 | 1 | 1 | 1 | 1 | 1 | 1 | 1 | 2 | 1 | 1 | 1 | 1     | 1                        | 1                                            |
| 112 | 3 | 1 | 1 | 2 | 1 | 1 | 3 | 1 | 3 | 2 | 1 | 1 | 1 | 2 | 2 | 1 | 1 | 2 | 2 | 1 | 2 | 2 | 3 | 2 | 2 | 1 | 1 | 1 | 1 | 1     | 1                        | 2 ADE                                        |
| 113 | 2 | 1 | 1 | 1 | 1 | 1 | 2 | 2 | 1 | 1 | 2 | 2 | 2 | 2 | 2 | 2 | 2 | 2 | 2 | 2 | 1 | 1 | 2 | 3 | 2 | 2 | 1 | 1 | 1 | 1     | 1                        | 1 CDE                                        |
| 114 | 1 | 1 | 1 | 2 | 1 | 1 | 1 | 1 | 2 | 1 | 1 | 1 | 1 | 1 | 1 | 1 | 2 | 1 | 1 | 1 | 1 | 1 | 3 | 2 | 1 | 1 | 1 | 1 | 1 | 1     | 1                        | 1 CDE                                        |
| 115 | 1 | 2 | 2 | 2 | 2 | 2 | 4 | 3 | 2 | 1 | 1 | 2 | 1 | 1 | 2 | 3 | 3 | 3 | 3 | 1 | 1 | 4 | 3 | 4 | 1 | 1 | 4 | 1 | 1 | 1     | 1                        | 1 ADE                                        |
| 116 | 1 | 1 | 1 | 1 | 1 | 1 | 1 | 1 | 2 | 1 | 2 | 1 | 1 | 2 | 1 | 1 | 1 | 1 | 1 | 1 | 1 | 4 | 4 | 2 | 1 | 1 | 1 | 1 | 1 | 1     | 1                        | 1 BEJ                                        |
| 117 | 1 | 1 | 1 | 1 | 1 | 1 | 1 | 1 | 2 | 1 | 1 | 1 | 1 | 1 | 1 | 1 | 1 | 1 | 1 | 1 | 1 | 1 | 1 | 2 | 2 | 1 | 1 | 1 | 1 | 1     | 1                        | 1 tired                                      |
| 118 | 2 | 1 | 1 | 3 | 1 | 2 | 4 | 1 | 3 | 3 | 3 | 2 | 1 | 1 | 1 | 1 | 1 | 4 | 1 | 1 | 4 | 1 | 4 | 1 | 2 | 2 | 1 | 1 | 1 | 1     | 1                        | 2 GH sleep                                   |
| 119 | 1 | 1 | 1 | 1 | 1 | 1 | 1 | 1 | 1 | 1 | 1 | 2 | 2 | 1 | 1 | 1 | 1 | 1 | 1 | 1 | 1 | 1 | 1 | 1 | 1 | 1 | 2 | 1 | 1 | 1     | 1                        | 1 A                                          |
| 120 | 3 | 1 | 1 | 1 | 1 | 1 | 3 | 2 | 1 | 1 | 3 | 1 | 1 | 1 | 1 | 1 | 1 | 1 | 1 | 1 | 1 | 2 | 1 | 2 | 1 | 2 | 1 | 2 | 1 | 1     | 1                        | 1 A                                          |
| 121 | 2 | 1 | 1 | 1 | 1 | 1 | 1 | 1 | 1 | 1 | 1 | 1 | 1 | 1 | 1 | 1 | 1 | 1 | 1 | 1 | 1 | 1 | 1 | 2 | 1 | 2 | 1 | 4 | 1 | 1     | 1                        | 1 AGH                                        |
| 122 | 1 | 1 | 1 | 1 | 1 | 1 | 1 | 1 | 1 | 1 | 1 | 1 | 1 | 1 | 1 | 1 | 1 | 1 | 1 | 1 | 2 | 2 | 2 | 2 | 1 | 2 | 1 | 1 | 1 | 1     | 1                        | 1 lichen planus                              |
| 123 | 1 | 1 | 1 | 2 | 1 | 1 | 4 | 1 | 1 | 1 | 2 | 1 | 2 | 1 | 2 | 2 | 2 | 2 | 2 | 2 | 1 | 2 | 2 | 2 | 3 | 1 | 2 | 1 | 1 | 1     | 1                        | 2 EJ Dry throat                              |
| 124 | 2 | 1 | 1 | 2 | 1 | 1 | 3 | 2 | 2 | 2 | 2 | 2 | 2 | 2 | 2 | 3 | 1 | 1 | 1 | 1 | 2 | 4 | 3 | 3 | 3 | 1 | 1 | 2 | 1 | 1     | 1                        | 2 EJCan't smoke and drink                    |
| 125 | 1 | 1 | 1 | 1 | 1 | 1 | 2 | 1 | 1 | 1 | 2 | 1 | 2 | 1 | 2 | 2 | 1 | 1 | 1 | 1 | 2 | 2 | 2 | 2 | 2 | 1 | 1 | 1 | 1 | 1     | 1                        | 1 Can't smoke and drink, social              |
| 126 | 2 | 1 | 1 | 1 | 1 | 1 | 1 | 1 | 1 | 1 | 1 | 2 | 1 | 1 | 2 | 1 | 1 | 1 | 1 | 1 | 2 | 1 | 2 | 1 | 1 | 1 | 1 | 1 | 1 | 1     | 1                        | 2 无                                          |
| 127 | 2 | 1 | 1 | 1 | 1 | 1 | 2 | 1 | 2 | 2 | 3 | 1 | 1 | 1 | 1 | 1 | 1 | 1 | 1 | 1 | 1 | 2 | 1 | 2 | 2 | 1 | 1 | 1 | 1 | 1     | 1                        | 2 DK sleep                                   |
| 128 | 2 | 1 | 1 | 1 | 1 | 1 | 1 | 1 | 1 | 1 | 1 | 1 | 1 | 1 | 2 | 1 | 1 | 1 | 1 | 1 | 1 | 2 | 1 | 2 | 2 | 1 | 1 | 1 | 1 | 1     | 1                        | 1 sleeo                                      |
| 129 | 1 | 1 | 1 | 1 | 1 | 1 | 3 | 1 | 2 | 1 | 2 | 2 | 4 | 2 | 2 | 1 | 1 | 1 | 1 | 1 | 2 | 3 | 4 | 3 | 2 | 2 | 1 | 3 | 2 | 1     | 1                        | 2 EF                                         |
| 130 | 2 | 2 | 2 | 2 | 1 | 1 | 2 | 1 | 1 | 2 | 2 | 2 | 2 | 1 | 1 | 1 | 1 | 1 | 1 | 1 | 1 | 1 | 1 | 2 | 1 | 3 | 1 | 1 | 1 | 1     | 1                        | 2 A                                          |
| 131 | 1 | 1 | 1 | 1 | 1 | 1 | 1 | 1 | 2 | 1 | 1 | 1 | 1 | 1 | 1 | 1 | 1 | 1 | 1 | 1 | 1 | 1 | 2 | 1 | 2 | 3 | 1 | 1 | 1 | 1     | 1                        | 1 A                                          |
| 132 | 1 | 1 | 1 | 2 | 1 | 1 | 1 | 1 | 1 | 2 | 1 | 1 | 1 | 1 | 1 | 2 | 1 | 1 | 1 | 1 | 1 | 1 | 1 | 2 | 2 | 2 | 1 | 1 | 1 | 1     | 1                        | 2 E                                          |
| 133 | 1 | 1 | 1 | 2 | 1 | 1 | 4 | 1 | 1 | 1 | 1 | 3 | 1 | 3 | 1 | 2 | 1 | 2 | 1 | 1 | 1 | 1 | 1 | 2 | 2 | 1 | 1 | 1 | 1 | 1     | 1                        | 2 H                                          |
| 134 | 1 | 1 | 1 | 2 | 1 | 1 | 1 | 1 | 2 | 2 | 1 | 1 | 2 | 1 | 1 | 2 | 1 | 1 | 1 | 1 | 2 | 1 | 3 | 2 | 2 | 4 | 1 | 1 | 1 | 1     | 1                        | 1 AH                                         |
| 135 | 1 | 1 | 1 | 2 | 1 | 1 | 4 | 1 | 1 | 1 | 2 | 1 | 3 | 2 | 3 | 1 | 1 | 2 | 3 | 1 | 1 | 2 | 3 | 2 | 3 | 1 | 1 | 1 | 1 | 1     | 1                        | 1 DHJ                                        |
| 136 | 1 | 1 | 1 | 1 | 1 | 1 | 1 | 1 | 1 | 1 | 2 | 1 | 2 | 1 | 1 | 2 | 1 | 1 | 1 | 2 | 1 | 2 | 3 | 2 | 2 | 1 | 1 | 1 | 1 | 1     | 1                        | 2 J                                          |
| 137 | 1 | 1 | 1 | 2 | 1 | 1 | 2 | 1 | 2 | 1 | 2 | 2 | 1 | 1 | 1 | 1 | 1 | 1 | 1 | 1 | 1 | 1 | 1 | 2 | 1 | 1 | 1 | 1 | 1 | 1     | 1                        | 2 DE                                         |
| 138 | 1 | 1 | 1 | 1 | 1 | 1 | 1 | 1 | 1 | 1 | 1 | 1 | 1 | 1 | 1 | 1 | 1 | 1 | 1 | 1 | 1 | 1 | 1 | 1 | 1 | 1 | 1 | 1 | 1 | 1     | 1                        | 2                                            |
| 139 | 1 | 1 | 1 | 2 | 1 | 1 | 2 | 2 | 2 | 2 | 2 | 2 | 2 | 1 | 3 | 2 | 2 | 2 | 2 | 1 | 3 | 3 | 3 | 2 | 1 | 1 | 1 | 1 | 1 | 2     | 1                        | 2 BDE                                        |
| 140 | 1 | 1 | 1 | 1 | 1 | 1 | 1 | 1 | 1 | 1 | 1 | 3 | 3 | 2 | 1 | 2 | 2 | 2 | 2 | 2 | 1 | 1 | 4 | 1 | 2 | 1 | 1 | 1 | 1 | 1     | 1                        | 2 FG                                         |
| 141 | 2 | 2 | 1 | 1 | 1 | 1 | 1 | 1 | 1 | 2 | 3 | 2 | 2 | 1 | 1 | 1 | 1 | 1 | 1 | 1 | 1 | 1 | 2 | 1 | 2 | 1 | 1 | 1 | 1 | 1     | 1                        | 2 BF                                         |
| 142 | 1 | 1 | 1 | 1 | 1 | 1 | 2 | 1 | 2 | 1 | 4 | 1 | 2 | 1 | 2 | 1 | 2 | 2 | 2 | 2 | 1 | 1 | 2 | 2 | 2 | 1 | 1 |   |   |       |                          |                                              |

|     |   |   |   |   |   |   |   |   |   |   |   |   |   |   |   |   |   |   |   |   |   |   |   |   |   |   |   |   |         |
|-----|---|---|---|---|---|---|---|---|---|---|---|---|---|---|---|---|---|---|---|---|---|---|---|---|---|---|---|---|---------|
| 165 | 1 | 1 | 1 | 1 | 1 | 1 | 1 | 1 | 2 | 3 | 3 | 1 | 1 | 2 | 1 | 1 | 1 | 1 | 2 | 2 | 1 | 1 | 2 | 2 | 1 | 1 | 1 | 1 | 1 b     |
| 166 | 1 | 1 | 1 | 1 | 2 | 1 | 1 | 1 | 3 | 1 | 2 | 1 | 1 | 1 | 1 | 1 | 1 | 1 | 1 | 1 | 1 | 1 | 1 | 1 | 1 | 1 | 1 | 1 |         |
| 167 | 1 | 1 | 1 | 1 | 2 | 1 | 1 | 2 | 1 | 1 | 1 | 1 | 1 | 2 | 1 | 1 | 1 | 1 | 1 | 1 | 1 | 2 | 1 | 1 | 1 | 1 | 1 | 1 |         |
| 168 | 3 | 1 | 2 | 2 | 1 | 2 | 4 | 1 | 2 | 2 | 4 | 3 | 4 | 3 | 2 | 2 | 2 | 2 | 1 | 3 | 3 | 4 | 3 | 2 | 1 | 1 | 2 | 1 | f g j   |
| 169 | 1 | 2 | 2 | 2 | 1 | 1 | 4 | 1 | 2 | 2 | 2 | 3 | 1 | 1 | 1 | 1 | 1 | 1 | 1 | 1 | 2 | 3 | 2 | 1 | 1 | 1 | 2 | 1 | a       |
| 170 | 1 | 1 | 1 | 1 | 1 | 1 | 2 | 1 | 1 | 1 | 1 | 1 | 1 | 1 | 1 | 1 | 1 | 1 | 1 | 2 | 1 | 1 | 2 | 1 | 1 | 1 | 1 | 1 | e       |
| 171 | 1 | 1 | 1 | 1 | 1 | 1 | 3 | 2 | 1 | 1 | 1 | 1 | 1 | 3 | 3 | 3 | 3 | 3 | 1 | 1 | 1 | 2 | 3 | 2 | 1 | 1 | 1 | 1 | 2 b d e |
| 172 | 1 | 1 | 1 | 1 | 2 | 1 | 1 | 3 | 2 | 3 | 3 | 4 | 2 | 3 | 3 | 1 | 1 | 1 | 1 | 1 | 2 | 1 | 2 | 1 | 1 | 1 | 1 | 1 | 1 b d g |
| 173 | 1 | 1 | 1 | 1 | 2 | 1 | 1 | 1 | 1 | 1 | 1 | 1 | 1 | 1 | 1 | 1 | 1 | 1 | 1 | 1 | 2 | 1 | 1 | 1 | 2 | 1 | 1 | 1 | 1 i     |
| 174 | 1 | 1 | 1 | 1 | 1 | 1 | 1 | 1 | 1 | 1 | 4 | 4 | 1 | 1 | 1 | 1 | 1 | 1 | 1 | 1 | 1 | 1 | 3 | 2 | 1 | 1 | 1 | 1 | 1 f g   |
| 175 | 3 | 1 | 2 | 2 | 1 | 1 | 2 | 1 | 2 | 1 | 2 | 3 | 1 | 2 | 1 | 1 | 1 | 1 | 1 | 1 | 1 | 2 | 1 | 1 | 1 | 1 | 2 | 2 |         |
| 176 | 1 | 1 | 1 | 2 | 1 | 1 | 1 | 1 | 1 | 1 | 1 | 1 | 1 | 1 | 1 | 1 | 1 | 1 | 1 | 1 | 1 | 1 | 1 | 1 | 1 | 1 | 1 | 1 |         |
| 177 | 1 | 2 | 1 | 1 | 1 | 1 | 1 | 1 | 1 | 1 | 1 | 1 | 1 | 1 | 1 | 1 | 1 | 1 | 1 | 1 | 1 | 1 | 1 | 1 | 1 | 1 | 1 | 1 |         |
| 178 | 1 | 1 | 1 | 1 | 1 | 1 | 1 | 1 | 1 | 2 | 1 | 1 | 1 | 1 | 1 | 1 | 1 | 1 | 1 | 1 | 1 | 1 | 1 | 1 | 1 | 1 | 1 | 1 |         |
| 179 | 1 | 1 | 1 | 1 | 2 | 1 | 1 | 1 | 2 | 2 | 1 | 1 | 2 | 1 | 1 | 1 | 1 | 1 | 1 | 1 | 2 | 3 | 1 | 1 | 1 | 1 | 1 | 1 | 2       |
| 180 | 1 | 2 | 1 | 1 | 1 | 1 | 2 | 1 | 2 | 1 | 2 | 1 | 1 | 1 | 1 | 1 | 1 | 1 | 1 | 1 | 1 | 1 | 1 | 1 | 1 | 1 | 1 | 1 | 1 a     |
| 181 | 1 | 1 | 1 | 1 | 2 | 1 | 1 | 1 | 1 | 2 | 1 | 1 | 1 | 1 | 1 | 1 | 1 | 1 | 1 | 1 | 1 | 1 | 1 | 1 | 1 | 1 | 1 | 1 | 1       |
| 182 | 1 | 1 | 1 | 1 | 1 | 1 | 1 | 1 | 1 | 1 | 2 | 1 | 1 | 2 | 1 | 1 | 1 | 1 | 1 | 1 | 1 | 1 | 1 | 1 | 1 | 1 | 1 | 1 | 1 B     |
| 183 | 1 | 1 | 1 | 2 | 1 | 1 | 2 | 1 | 1 | 2 | 1 | 1 | 1 | 1 | 2 | 2 | 2 | 1 | 1 | 1 | 1 | 1 | 2 | 1 | 2 | 1 | 1 | 1 | 2 D H J |
| 184 | 1 | 1 | 1 | 3 | 1 | 1 | 4 | 1 | 3 | 3 | 4 | 4 | 2 | 1 | 3 | 2 | 3 | 2 | 1 | 2 | 3 | 4 | 2 | 3 | 1 | 1 | 2 | 1 | 1 D G H |
| 185 | 1 | 1 | 1 | 1 | 1 | 1 | 4 | 2 | 2 | 1 | 2 | 1 | 4 | 2 | 2 | 2 | 2 | 2 | 1 | 1 | 3 | 3 | 2 | 3 | 1 | 1 | 2 | 1 | 1 B C H |
| 186 | 1 | 1 | 1 | 1 | 1 | 1 | 4 | 1 | 1 | 1 | 2 | 1 | 1 | 3 | 2 | 1 | 2 | 2 | 1 | 1 | 3 | 3 | 3 | 1 | 1 | 1 | 1 | 1 | 2 B D E |
| 187 | 1 | 1 | 1 | 1 | 1 | 1 | 2 | 1 | 1 | 1 | 2 | 1 | 2 | 2 | 1 | 1 | 1 | 1 | 1 | 1 | 1 | 3 | 2 | 2 | 1 | 1 | 1 | 1 | 2 B J   |
| 188 | 1 | 1 | 1 | 2 | 1 | 1 | 3 | 1 | 1 | 1 | 2 | 1 | 1 | 2 | 1 | 1 | 1 | 1 | 1 | 1 | 1 | 3 | 2 | 1 | 1 | 1 | 1 | 2 | 1       |
| 189 | 1 | 1 | 1 | 1 | 1 | 1 | 1 | 1 | 1 | 2 | 1 | 2 | 2 | 1 | 1 | 1 | 1 | 1 | 1 | 1 | 1 | 1 | 1 | 1 | 1 | 1 | 1 | 1 | 2       |
| 190 | 1 | 1 | 1 | 1 | 1 | 1 | 1 | 1 | 1 | 1 | 1 | 1 | 1 | 1 | 1 | 1 | 1 | 1 | 1 | 1 | 1 | 1 | 1 | 1 | 1 | 1 | 1 | 1 |         |
| 191 | 1 | 1 | 1 | 1 | 1 | 1 | 2 | 1 | 1 | 1 | 1 | 1 | 1 | 1 | 1 | 1 | 1 | 1 | 1 | 1 | 1 | 1 | 1 | 1 | 1 | 1 | 1 | 1 | 2 H     |
| 192 | 1 | 1 | 1 | 2 | 1 | 1 | 2 | 1 | 1 | 1 | 2 | 2 | 1 | 1 | 1 | 2 | 2 | 1 | 2 | 2 | 2 | 2 | 2 | 1 | 1 | 1 | 1 | 1 | 1 B E H |
| 193 | 1 | 1 | 1 | 1 | 1 | 1 | 1 | 1 | 1 | 2 | 3 | 1 | 1 | 2 | 2 | 4 | 1 | 2 | 1 | 2 | 1 | 3 | 2 | 2 | 4 | 1 | 2 | 1 | 1 B D G |
| 194 | 1 | 2 | 1 | 1 | 1 | 1 | 1 | 1 | 1 | 2 | 1 | 1 | 1 | 1 | 1 | 1 | 1 | 1 | 1 | 2 | 1 | 2 | 1 | 1 | 1 | 1 | 1 | 1 | 1 A     |
| 195 | 1 | 1 | 1 | 1 | 1 | 1 | 1 | 2 | 1 | 1 | 2 | 1 | 1 | 1 | 2 | 1 | 1 | 1 | 1 | 1 | 1 | 1 | 2 | 1 | 1 | 1 | 1 | 1 | 2       |
| 196 | 1 | 1 | 2 | 1 | 1 | 1 | 1 | 1 | 2 | 2 | 1 | 1 | 1 | 2 | 2 | 1 | 1 | 2 | 1 | 2 | 3 | 3 | 2 | 1 | 1 | 1 | 1 | 1 | 1 A J   |
| 197 | 1 | 1 | 1 | 1 | 1 | 1 | 1 | 1 | 1 | 1 | 2 | 1 | 1 | 1 | 2 | 1 | 1 | 1 | 1 | 1 | 1 | 1 | 1 | 1 | 1 | 1 | 1 | 1 | 2 K 经济  |
| 198 | 2 | 2 | 2 | 2 | 2 | 1 | 4 | 2 | 3 | 2 | 3 | 3 | 3 | 3 | 2 | 3 | 3 | 1 | 2 | 3 | 3 | 3 | 2 | 2 | 1 | 1 | 1 | 1 | 1 D E F |
| 199 | 1 | 1 | 1 | 2 | 1 | 1 | 1 | 1 | 1 | 2 | 1 | 2 | 1 | 1 | 1 | 2 | 2 | 2 | 2 | 1 | 1 | 1 | 2 | 1 | 1 | 1 | 1 | 1 | 2       |
| 200 | 2 | 1 | 1 | 1 | 1 | 1 | 1 | 1 | 1 | 2 | 1 | 1 | 1 | 1 | 1 | 1 | 1 | 1 | 2 | 1 | 1 | 1 | 1 | 1 | 4 | 1 | 1 | 1 |         |
| 201 | 4 | 1 | 4 | 1 | 1 | 4 | 4 | 1 | 4 | 3 | 1 | 4 | 1 | 4 | 2 | 2 | 4 | 1 | 1 | 1 | 1 | 4 | 4 | 1 | 4 | 2 | 1 | 1 | 1 B C E |
| 202 | 1 | 1 | 1 | 1 | 1 | 1 | 1 | 1 | 1 | 1 | 1 | 1 | 1 | 1 | 1 | 1 | 1 | 1 | 1 | 1 | 1 | 1 | 2 | 1 | 1 | 1 | 1 | 1 |         |
| 203 | 1 | 1 | 2 | 1 | 1 | 1 | 1 | 1 | 1 | 1 | 1 | 1 | 1 | 1 | 1 | 1 | 1 | 1 | 1 | 1 | 1 | 2 | 2 | 1 | 1 | 1 | 1 | 1 |         |
| 204 | 2 | 1 | 1 | 1 | 1 | 1 | 1 | 1 | 1 | 1 | 1 | 1 | 1 | 1 | 1 | 1 | 1 | 1 | 1 | 1 | 1 | 1 | 1 | 1 | 1 | 1 | 1 | 1 |         |
| 205 | 3 | 3 | 3 | 1 | 3 | 3 | 3 | 3 | 2 | 2 | 3 | 2 | 3 | 3 | 3 | 3 | 3 | 3 | 3 | 2 | 3 | 3 | 3 | 1 | 1 | 1 | 1 | 1 | 2 A D J |
| 206 | 2 | 1 | 2 | 2 | 1 | 1 | 1 | 1 | 2 | 1 | 2 | 1 | 1 | 1 | 1 | 1 | 1 | 1 | 1 | 1 | 1 | 1 | 1 | 1 | 1 | 2 | 1 | 1 | 1 C J   |
| 207 | 2 | 4 | 1 | 2 | 1 | 2 | 3 | 2 | 3 | 2 | 3 | 2 | 2 | 3 | 2 | 2 | 2 | 2 | 1 | 1 | 3 | 3 | 2 | 1 | 1 | 3 | 2 | 1 | 1 A D E |
| 208 | 2 | 1 | 2 | 2 | 2 | 2 | 3 | 2 | 2 | 2 | 2 | 1 | 2 | 1 | 1 | 1 | 1 | 1 | 1 | 1 | 1 | 2 | 2 | 1 | 1 | 1 | 2 | 1 | 1 A C   |
| 209 | 2 | 1 | 2 | 2 | 1 | 1 | 3 | 2 | 1 | 2 | 2 | 1 | 2 | 2 | 1 | 1 | 2 | 2 | 1 | 1 | 3 | 3 | 3 | 1 | 1 | 1 | 2 | 1 | 1 C D E |
| 210 | 1 | 1 | 1 | 2 | 1 | 1 | 1 | 1 | 1 | 1 | 1 | 1 | 1 | 1 | 1 | 1 | 1 | 1 | 1 | 1 | 1 | 1 | 1 | 1 | 1 | 1 | 1 | 1 |         |
| 211 | 2 | 2 | 1 | 1 | 1 | 1 | 1 | 1 | 2 | 1 | 1 | 2 | 1 | 1 | 1 | 1 | 1 | 1 | 1 | 1 | 1 | 1 | 1 | 2 | 1 | 1 | 1 | 1 | 1 A     |
| 212 | 2 | 1 | 2 | 2 | 1 | 3 | 3 | 1 | 1 | 2 | 2 | 2 | 1 | 1 | 1 | 1 | 1 | 1 | 1 | 1 | 2 | 1 | 2 | 1 | 1 | 1 | 2 | 1 | 1 A     |
| 213 | 1 | 1 | 2 | 1 | 1 | 2 | 3 | 1 | 1 | 2 | 1 | 1 | 1 | 1 | 1 | 1 | 1 | 1 | 1 | 1 | 1 | 2 | 1 | 1 | 1 | 1 | 2 | 1 |         |
| 200 | 2 | 1 | 1 | 1 | 1 | 1 | 1 | 1 | 1 | 2 | 1 | 1 | 1 | 1 | 1 | 1 | 1 | 1 | 1 | 1 | 2 | 1 | 1 | 2 | 1 | 4 | 1 | 1 | 1       |
| 201 | 3 | 1 | 3 | 3 | 1 | 4 | 4 | 1 | 2 | 3 | 1 | 2 | 2 | 4 | 3 | 3 | 4 | 1 | 1 | 1 | 4 | 4 | 1 | 3 | 3 | 2 | 1 | 1 | 1 A B E |
| 202 | 1 | 1 | 1 | 1 | 1 | 1 | 1 | 1 | 1 | 1 | 1 | 1 | 1 | 1 | 1 | 1 | 1 | 1 | 1 | 1 | 1 | 1 | 1 | 1 | 1 | 1 | 1 | 1 |         |
| 203 | 1 | 1 | 2 | 1 | 1 | 1 | 1 | 1 | 1 | 1 | 1 | 1 | 1 | 1 | 1 | 1 | 1 | 1 | 1 | 1 | 1 | 2 | 2 | 1 | 1 | 1 | 1 | 1 |         |
| 204 | 2 | 1 | 1 | 1 | 1 | 1 | 1 | 1 | 1 | 1 | 1 | 1 | 1 | 1 | 1 | 1 | 1 | 1 | 1 | 1 | 1 | 1 | 1 | 1 | 1 | 1 | 2 | 1 |         |
| 205 | 3 | 2 | 2 | 2 | 3 | 3 | 3 | 3 | 3 | 3 | 3 | 3 | 1 | 2 | 3 | 3 | 3 | 3 | 1 | 1 | 2 | 3 | 3 | 1 | 1 | 1 | 2 | 1 |         |
| 206 | 2 | 1 | 1 | 1 | 1 | 1 | 1 | 1 | 1 | 1 | 1 | 2 | 1 | 1 | 1 | 1 | 1 | 1 | 1 | 1 | 1 | 1 | 1 | 1 | 1 | 1 | 1 | 1 | 1 C J   |
| 207 | 2 | 4 | 1 | 2 | 1 | 2 | 3 | 2 | 3 | 3 | 3 | 2 | 3 | 2 | 2 | 2 | 2 | 2 | 1 | 1 | 3 | 3 | 2 | 1 | 1 | 3 | 2 | 1 |         |
| 208 | 2 | 1 | 2 | 2 | 2 | 2 | 3 | 2 | 2 | 2 | 1 | 2 | 1 | 1 | 1 | 1 | 1 | 1 | 1 | 1 | 1 | 2 | 2 | 1 | 1 | 1 | 2 | 1 |         |
| 209 | 2 | 1 | 2 | 2 | 1 | 1 | 3 | 2 | 1 | 2 | 2 | 2 | 1 | 1 | 2 | 2 | 2 | 1 | 1 | 1 | 3 | 2 | 2 | 2 | 1 | 1 | 2 | 1 | 1 C D E |
| 210 | 1 | 1 | 1 | 2 | 1 | 1 | 1 | 1 | 1 | 1 | 1 | 1 | 1 | 1 | 1 | 1 | 1 | 1 | 1 | 1 | 1 | 1 | 1 | 1 | 1 | 1 | 1 | 1 |         |
| 211 | 2 | 2 | 1 | 1 | 1 | 1 | 1 | 1 | 2 | 1 | 1 | 2 | 1 | 1 | 1 | 1 | 1 | 1 | 1 | 1 | 1 | 1 | 1 | 2 | 1 | 1 | 1 | 1 |         |
| 212 | 2 | 2 | 1 | 2 | 1 | 3 | 3 | 1 | 1 | 2 | 2 | 2 | 1 | 1 | 1 | 1 | 1 | 1 | 1 | 1 | 2 | 1 | 2 | 1 | 1 | 1 | 2 | 1 |         |
| 213 | 1 | 1 | 1 | 1 | 1 | 1 | 2 | 3 | 1 | 1 | 2 | 1 | 1 | 1 | 1 | 1 | 1 | 1 | 1 | 1 | 2 | 1 | 2 | 1 | 1 | 1 | 2 | 1 | 1 E J   |
